# Supplementary material for: Ultrafast nonlinear optical properties of MTe2 (M = V and Ta) and their application as broadband saturable absorbers
Source: Royal Society of Chemistry journal article supplement (doi:10.1039/d3tc03456a), 2023-11-30
Supplement: d3tc03456a1.pdf [file d3tc03456a1.pdf]

# Ultrafast Nonlinear Optical Properties of $MTe_2$ ( $M = V$ and Ta) and Their Application as Broadband Saturable Absorbers

Wenyao Zhang,<sup>a,†</sup> Zichen Li,<sup>a,†</sup> Xudong Leng,<sup>b</sup> Qun Jing,<sup>b</sup> Qiao Wen<sup>\*a</sup>

<sup>a</sup>Key Laboratory of Optoelectronic Devices and Systems of Ministry of Education and Guangdong Province,  
College of Physics and Optoelectronic Engineering, Shenzhen University · Shenzhen 518060, China;

<sup>b</sup>Xinjiang Key for Laboratory of Solid state Physics and Devices, Xinjiang University, 777 Huarui Street, Urumqi  
830017, China;

<sup>†</sup> These authors contributed equally to this work.

\* E-mail: [wengqiao@szu.edu.cn](mailto:wengqiao@szu.edu.cn);

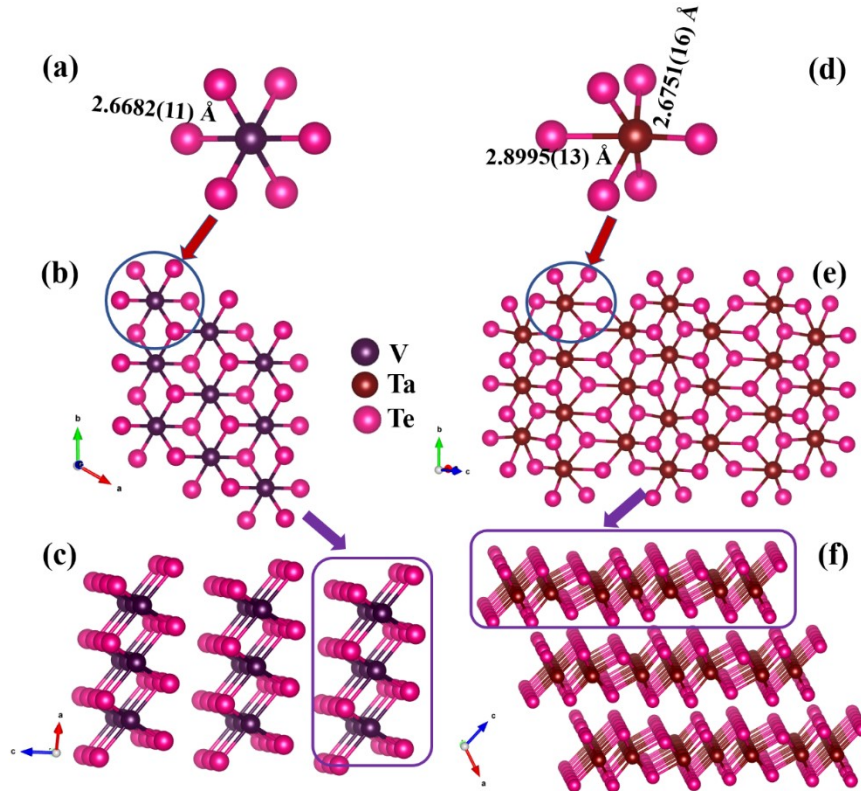

**Fig. S1** Crystal structures of  $M\text{Te}_2$  ( $M = \text{V}$  and  $\text{Ta}$ ). (a)-(c) the  $\text{VTe}_6$  octahedron,  $[\text{VTe}]$  layer, stacked  $[\text{VTe}]$  layers along the  $c$  direction. (d)-(f) the  $\text{TaTe}_6$  octahedron,  $[\text{TaTe}]$  layer, stacked  $[\text{TaTe}]$  layers along the  $a$  direction.

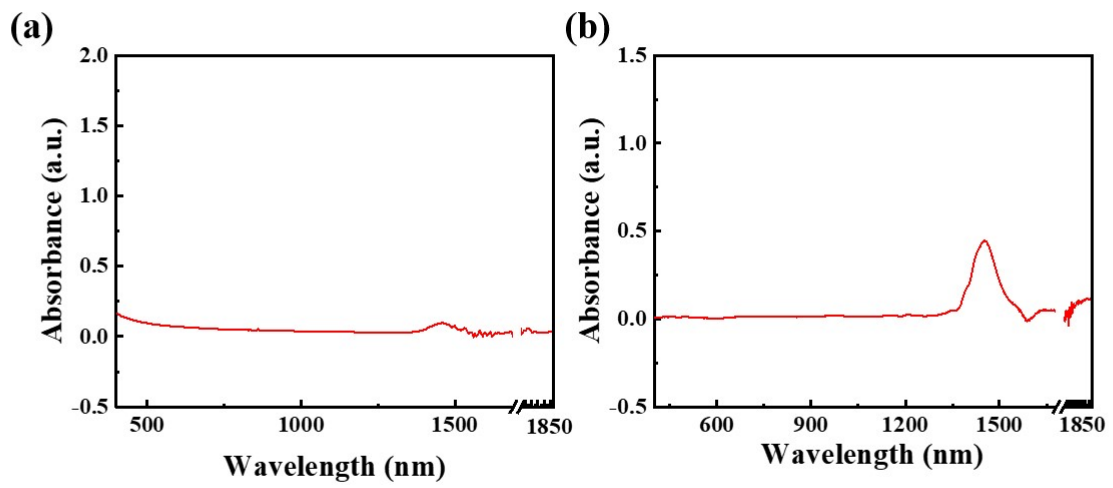

**Fig. S2** Measured linear absorption spectra of (a) VTe<sub>2</sub> and (b) TaTe<sub>2</sub>.

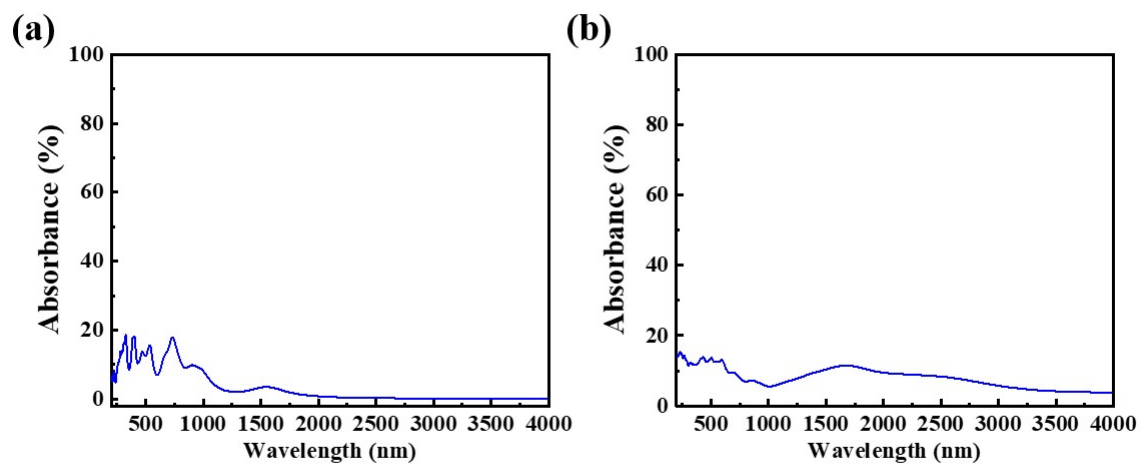

**Fig. S3** Calculated absorption spectra of monolayer (a) VTe<sub>2</sub> and (b) TaTe<sub>2</sub>.

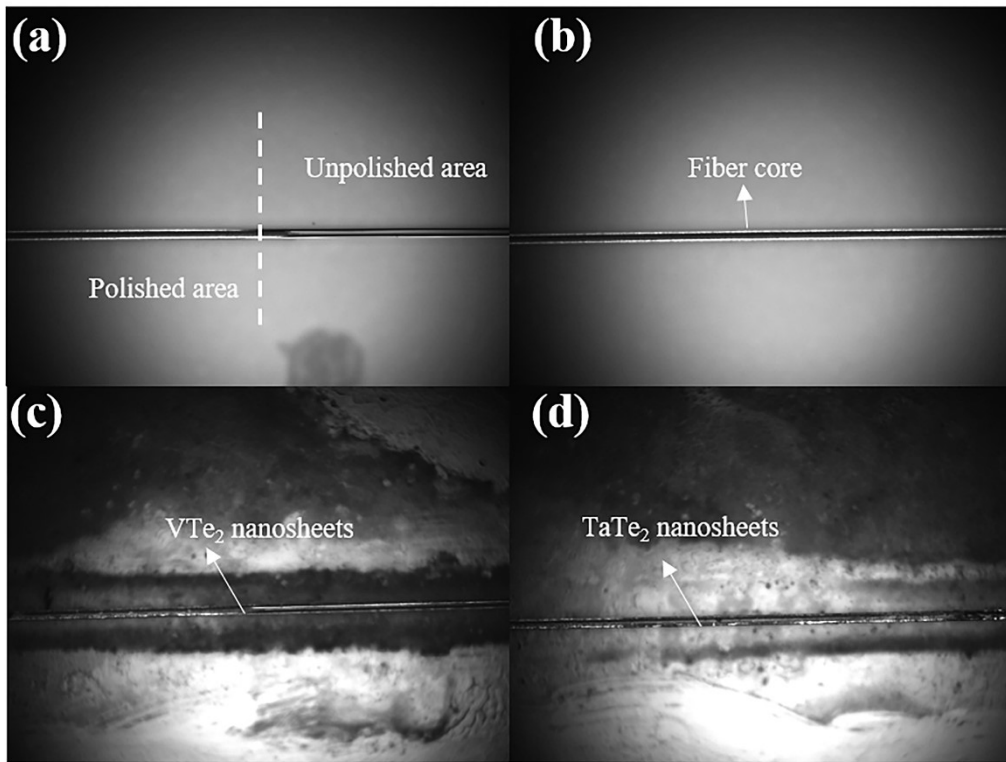

**Fig. S4** (a and b) images of the D-shaped fiber without material deposition, (c and d) images of the D-shaped fiber with material deposition as SA devices.

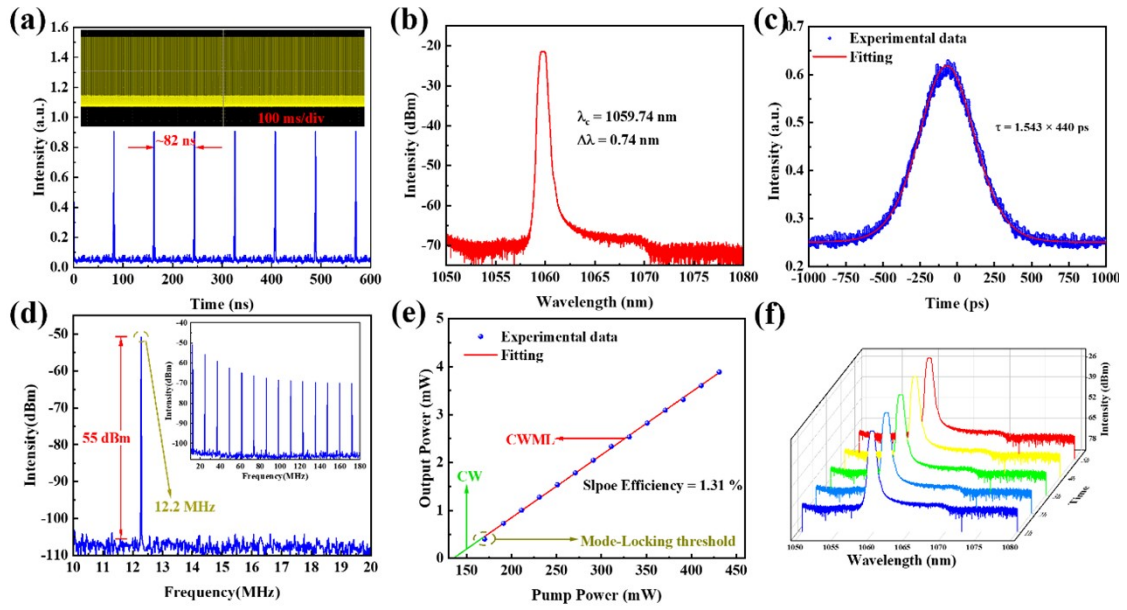

**Fig. S5** Typical mode-locked pulse characteristics. (a) Pulse train; (b) Optical spectrum; (c) Measurement of the laser pulse width; (d) Radio frequency spectrum (inset: the wideband RF spectrum) of the mode-locked pulses; (e) Variation in the output power with respect to the pump power; (f) Optical spectral measurements at 1 h intervals over 5 h.

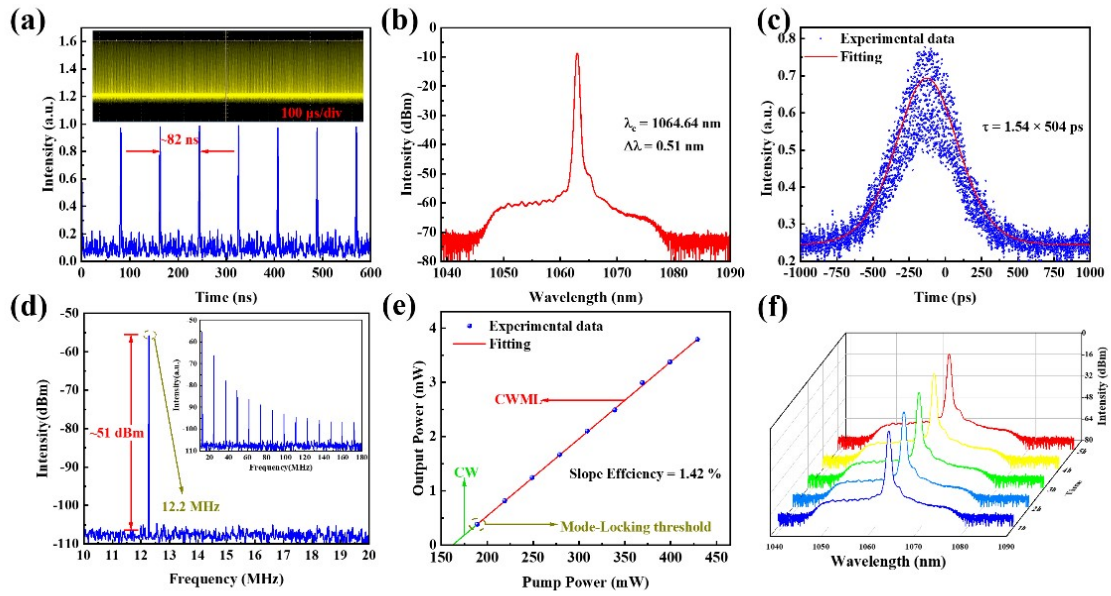

**Fig. S6** Typical mode-locked pulse characteristics. (a) Pulse train; (b) Optical spectrum; (c) Measurement of the laser pulse width; (d) Radio frequency spectrum (inset: the wideband RF spectrum) of the mode-locked pulses; (e) Variation in the output power with respect to the pump power; (f) Optical spectral measurements at 1 h intervals over 5 h.

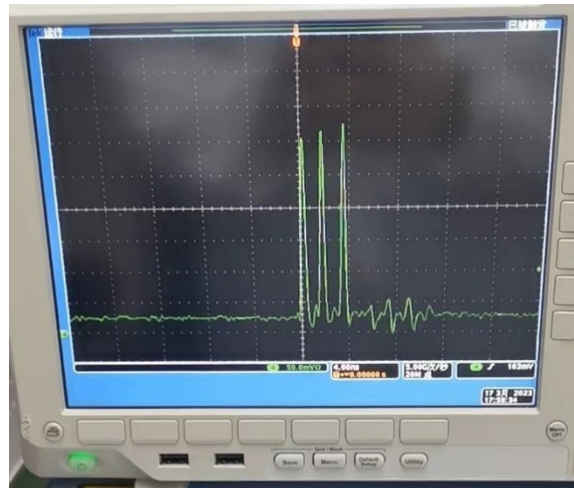

**Fig. S7** Multi-soliton pulses appeared when the pump power increases.
